# Supplementary material for: Estimating SARS-CoV-2 seroprevalence and epidemiological parameters with uncertainty from serological surveys
Source: eLife journal article supplement (doi:10.7554/elife.64206), 2021-03-05
Supplement: supp [file elife-64206-supp-v1.zip]

| <b>Manufacturer</b> | <b>Test</b>               | <b>Sensitivity</b> | <b>Specificity</b> |
|---------------------|---------------------------|--------------------|--------------------|
| *EuroImmun          | SARS-COV-2 ELISA (IgG)    | 90.0% (27/30)      | >99.9% (80/80)     |
| †Roche              | Elecsys Anti-SARS-CoV-2 S | 96.6% (225/233)    | >99.9% (5990/5991) |
| †Abbott             | Architect SARS-CoV-2 IgG  | >99.9% (88/88)     | 99.6% (1066/1070)  |

\* included only in main text modeling, calculations, and figures.

† included in Supplementary modeling, calculations, and figures.

Table 1: **Serological tests and performance characteristics considered in this study.** Sensitivity and specificity values were taken from manufacturer’s claims as of February, 2021 as filed with the U.S. Food and Drug Administration [30].
