# Supplementary material for: Estimating SARS-CoV-2 seroprevalence and epidemiological parameters with uncertainty from serological surveys
Source: eLife journal article supplement (doi:10.7554/elife.64206), 2021-03-05
Supplement: supp [file elife-64206-supp-v1.zip]

| Single-population seroprevalence estimation |                                                                            |                                                                                                                                                                                                                                                                      |                        |
|---------------------------------------------|----------------------------------------------------------------------------|----------------------------------------------------------------------------------------------------------------------------------------------------------------------------------------------------------------------------------------------------------------------|------------------------|
| Parameter                                   | Meaning                                                                    | Value                                                                                                                                                                                                                                                                | Notes                  |
| $\theta$                                    | Seropositive fraction in synthetic data experiments                        | various, between 0.01 and 0.50                                                                                                                                                                                                                                       | used in Figure 2       |
| Single-population SEIR model                |                                                                            |                                                                                                                                                                                                                                                                      |                        |
| Parameter                                   | Meaning                                                                    | Value                                                                                                                                                                                                                                                                | Notes                  |
| $\alpha$                                    | Transition rate $E \rightarrow I$                                          | 0.2                                                                                                                                                                                                                                                                  |                        |
| $\beta$                                     | Infectiousness                                                             | 1.75                                                                                                                                                                                                                                                                 |                        |
| $\gamma$                                    | Recovery rate                                                              | 0.5                                                                                                                                                                                                                                                                  |                        |
| $\rho$                                      | Social distancing effects                                                  | 0.5, 0.75                                                                                                                                                                                                                                                            |                        |
| $(n_+, n_-)$                                | (positive, negative) test counts                                           | (13, 87), (130, 870)                                                                                                                                                                                                                                                 | used in Figure 4       |
| Age-structured seroprevalence estimation    |                                                                            |                                                                                                                                                                                                                                                                      |                        |
| Parameter                                   | Meaning                                                                    | Value                                                                                                                                                                                                                                                                | Notes                  |
| $\theta_i$                                  | Seropositivity of age- $i$ subpopulation in synthetic data experiments     | $\tilde{\theta} + [-0.014, -0.012, -0.004, 0.002, 0.008, 0.015, 0.018, 0.020, 0.006, 0.005, 0.003, -0.003, -0.009, -0.010, -0.012, -0.012]$ , with $\tilde{\theta}$ between 0.05 and 0.50, representing the unweighted average seroprevalence across subpopulations. | used in Figure 3       |
| $\theta_i$                                  | Seropositivity of age- $i$ subpopulation adapted from empirical study      | [0.018, 0.018, 0.107, 0.107, 0.109, 0.109, 0.109, 0.109, 0.109, 0.109, 0.0821, 0.082, 0.082, 0.047, 0.047, 0.047]                                                                                                                                                    | [32]; used in Figure 5 |
| Age-structured SEIR model                   |                                                                            |                                                                                                                                                                                                                                                                      |                        |
| Parameter                                   | Meaning                                                                    | Value                                                                                                                                                                                                                                                                | Notes                  |
| $u_i$                                       | Relative susceptibility of age group $i$                                   | [0.40, 0.40, 0.38, 0.38, 0.79, 0.79, 0.86, 0.86, 0.80, 0.80, 0.82, 0.82, 0.88, 0.88, 0.74, 0.74]                                                                                                                                                                     | [27]                   |
| $y_i$                                       | Probability that an infection is clinical for an age- $i$ individual       | [0.29, 0.29, 0.21, 0.21, 0.27, 0.27, 0.33, 0.33, 0.40, 0.40, 0.49, 0.49, 0.63, 0.63, 0.69, 0.69]                                                                                                                                                                     | [27]                   |
| $C_{ij}$                                    | Number of age- $j$ individuals contacted by an age- $i$ individual per day | U.S.A., India, and Switzerland                                                                                                                                                                                                                                       | [18]<br>(see caption)  |
| $\mu_E$                                     | Mean incubation period                                                     | 3 days                                                                                                                                                                                                                                                               | [27, 43]               |
| $\mu_p$                                     | Mean duration of preclinical infectiousness                                | 2.1 days                                                                                                                                                                                                                                                             | [27, 43]               |
| $\mu_c$                                     | Mean duration of clinical infectiousness                                   | 2.9 days                                                                                                                                                                                                                                                             | [27, 44]               |
| $\mu_s$                                     | Mean duration of subclinical infectiousness                                | 5 days                                                                                                                                                                                                                                                               | [27]                   |
| $f$                                         | Relative infectiousness of subclinical cases                               | 50%                                                                                                                                                                                                                                                                  | [27]                   |

Table 2: **Parameter values used in dynamical models and numerical experiments.** This table is divided into four sections. The top two sections correspond to the parameters of the single-population modeling. The bottom two sections correspond to the parameters used in the age-structured modeling. Sections corresponding to  $\theta$  and  $\theta_i$  are separated to indicate that their values were used in synthetic data experiments to assess performance of the Bayesian inference methods on varying seroprevalence levels, to separate them from SEIR model parameters. Contact matrices  $C_{ij}$  used in this manuscript were, in particular, those corresponding to the United States of America, India, and Switzerland. Equations for models can be found in the Appendix. Test kit sensitivity and specificity values are provided in Supplementary File 1. Subpopulation seropositivity values  $\theta_i$  were synthetically generated to accommodate moderate variation between subpopulations as well as the ability for mean seropositivity to be easily adjusted (used in Figure 3, or were generalized to 5-year age bins from the age-stratified serosurvey of Stringhini et al. [32] based in Geneva, Switzerland, as shown (used in Figure 5).
