# Supplementary figures and images for: Estimating SARS-CoV-2 seroprevalence and epidemiological parameters with uncertainty from serological surveys
Source: eLife journal article supplement (doi:10.7554/elife.64206), 2021-03-05

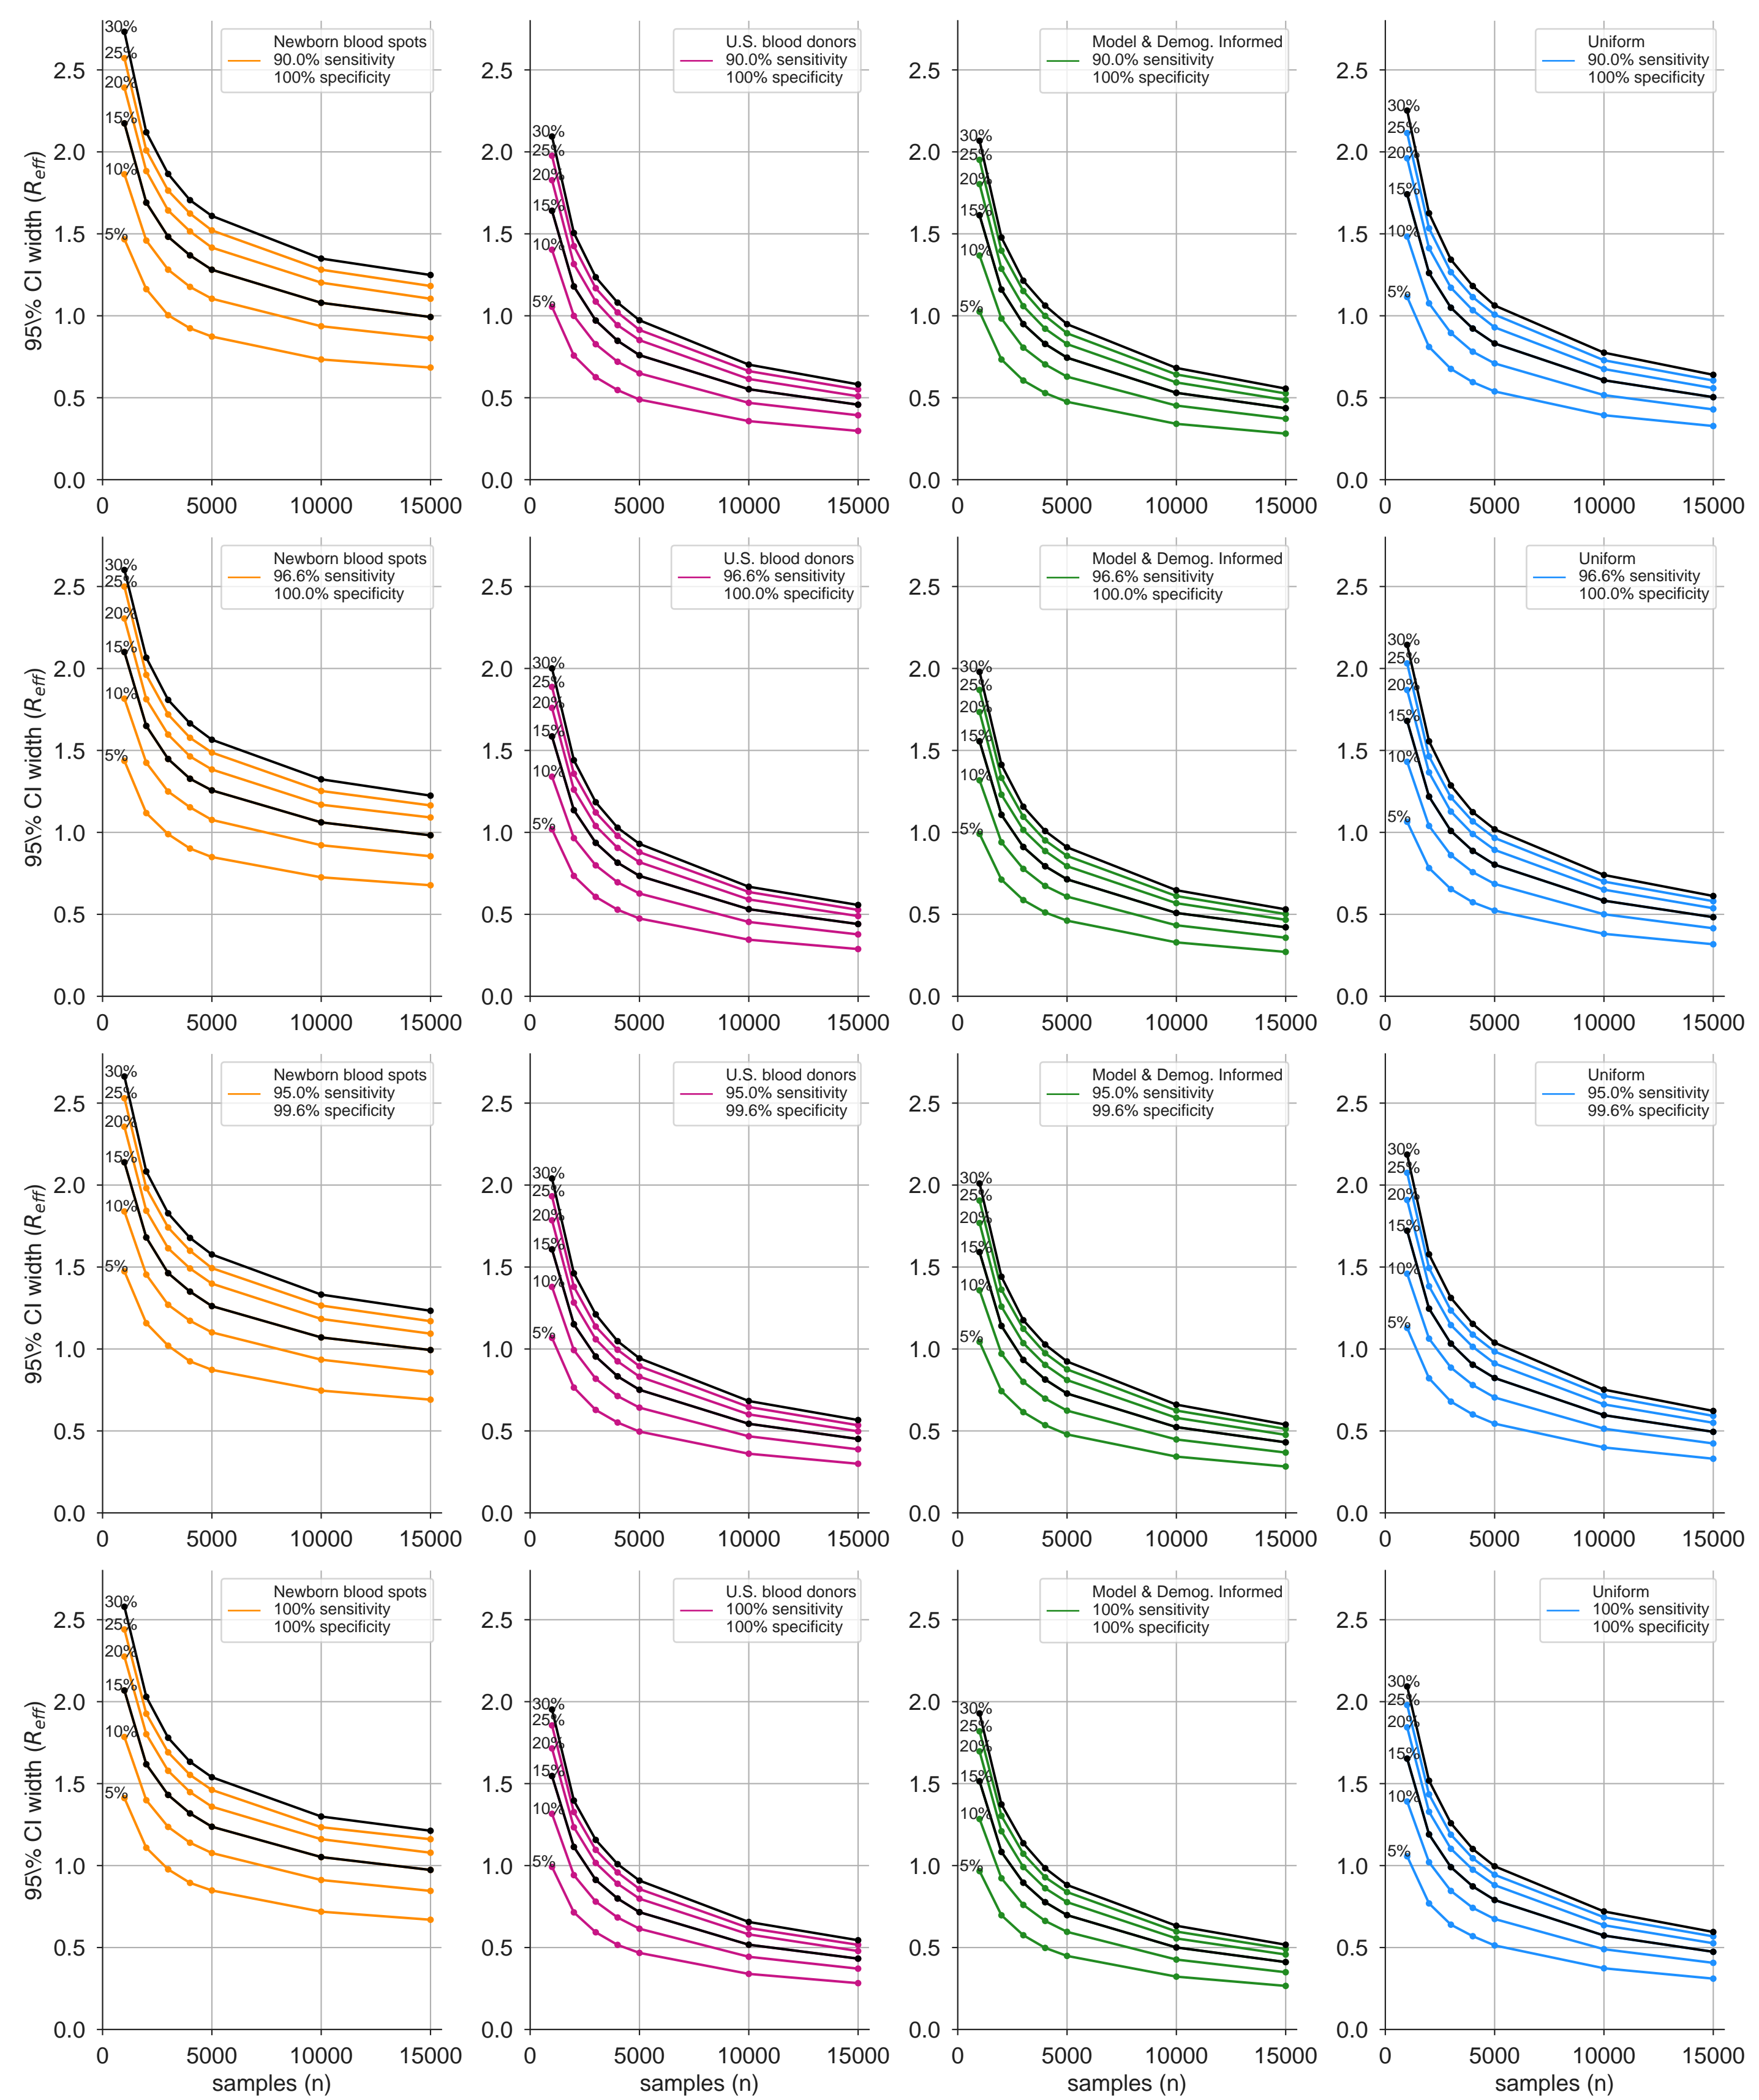

Supplement: supp [file elife-64206-supp-v1.zip]

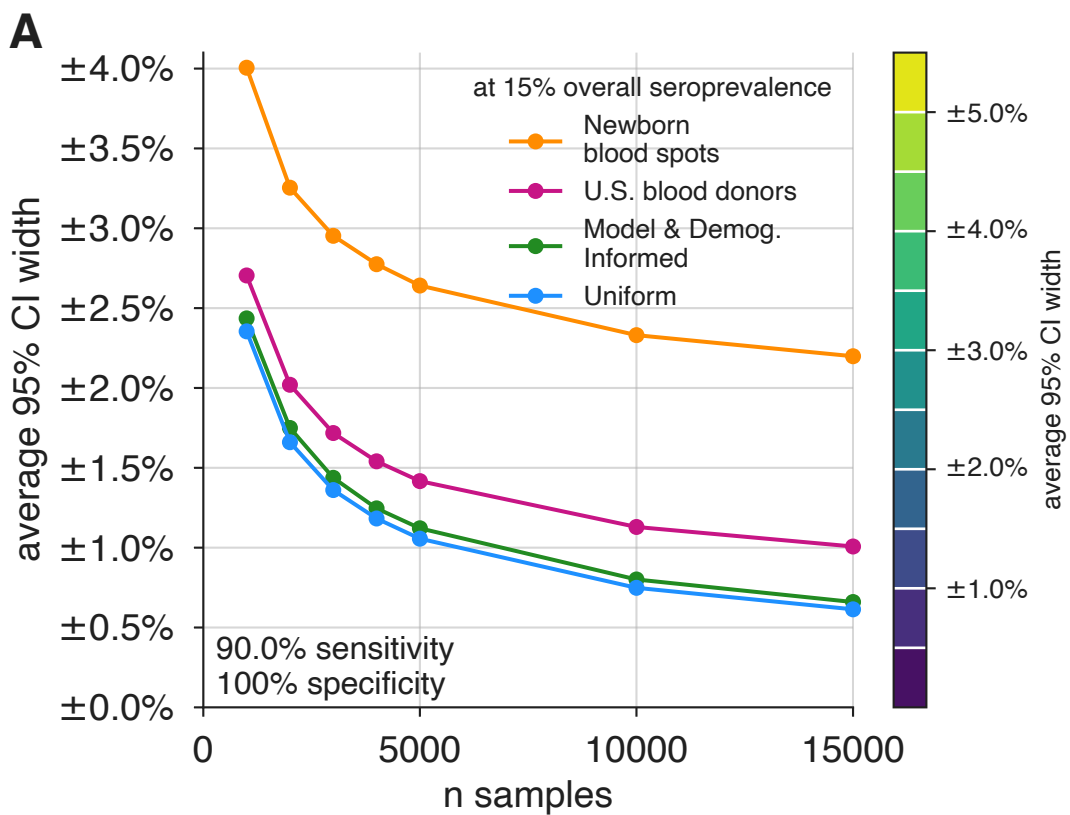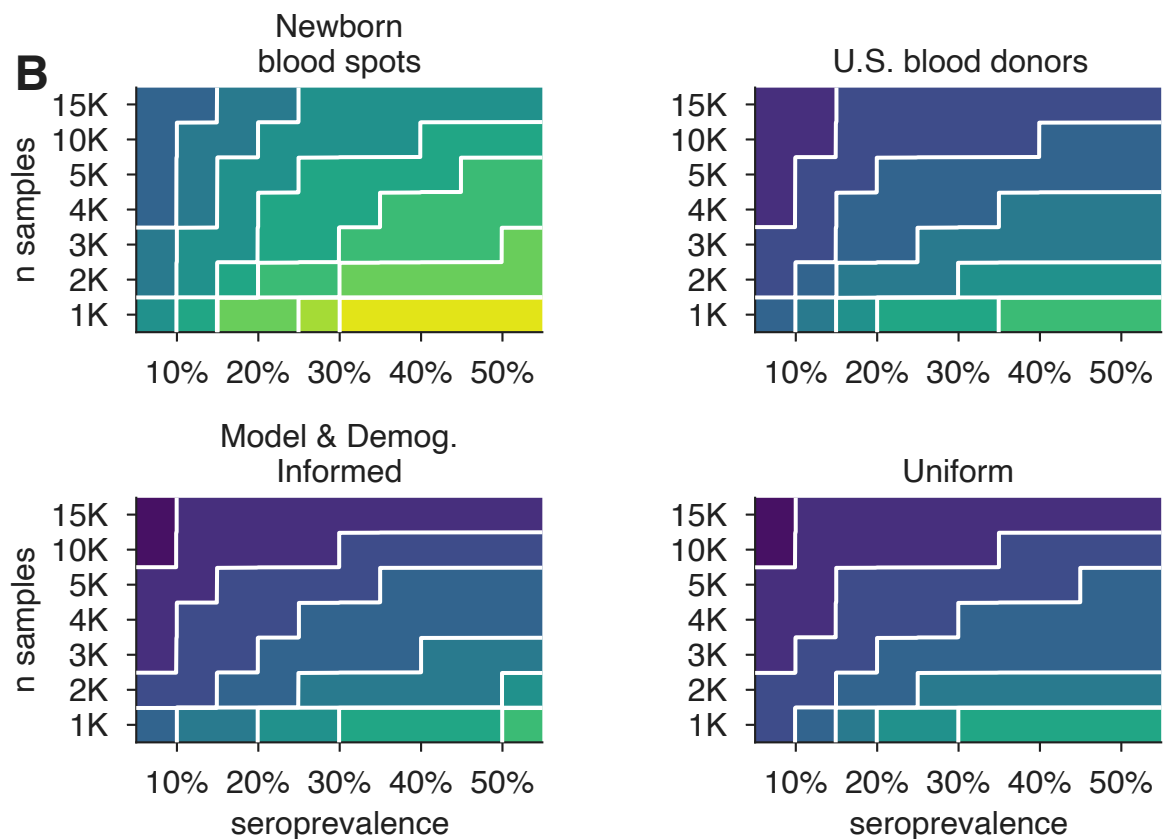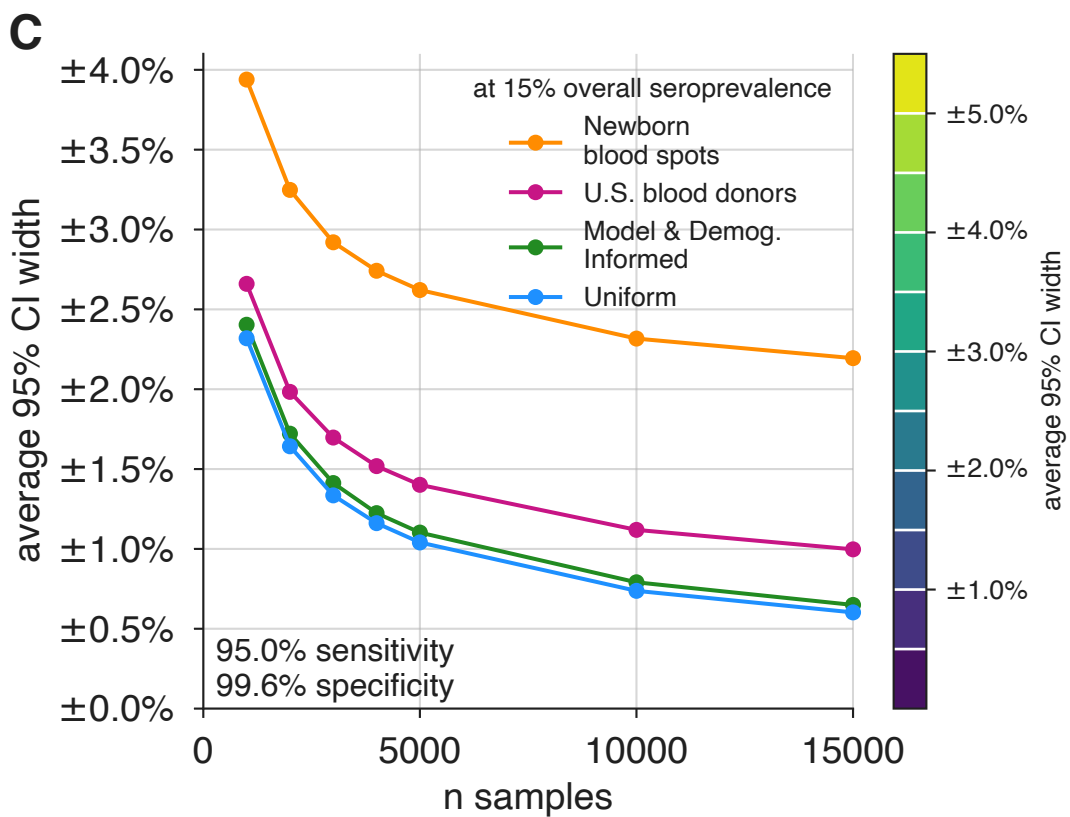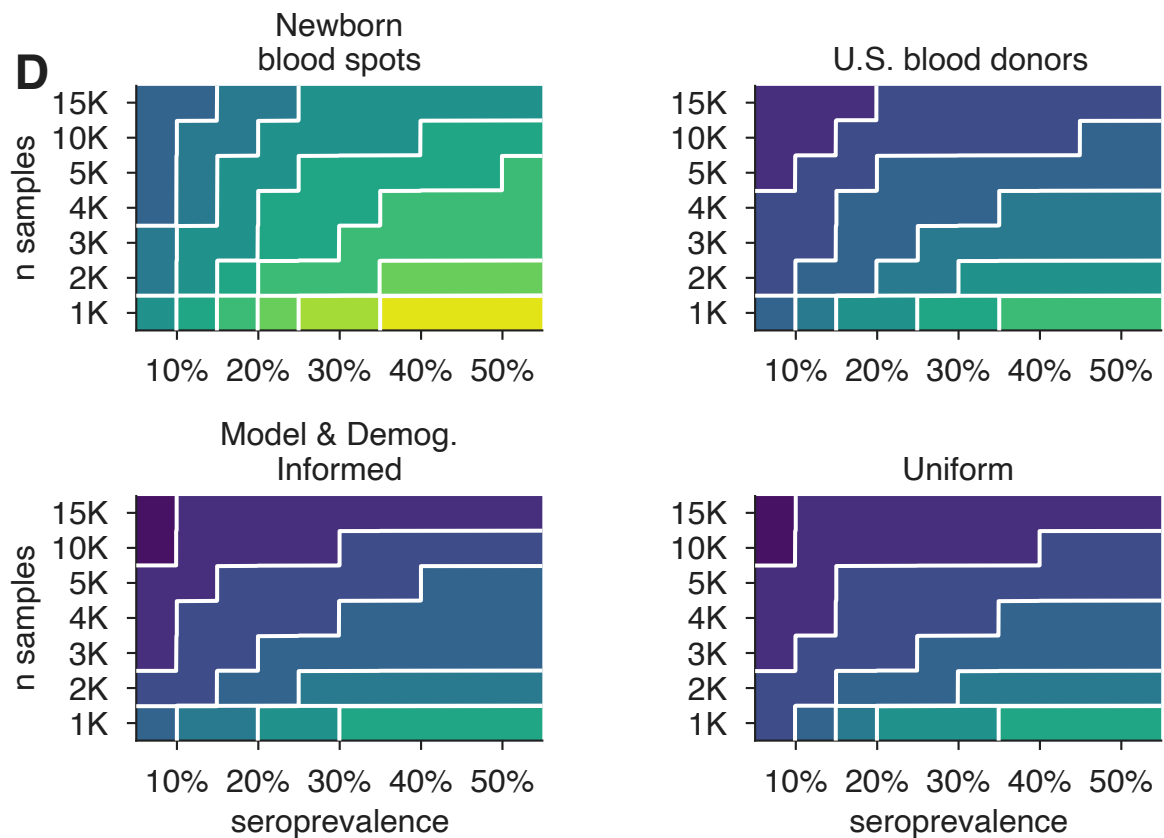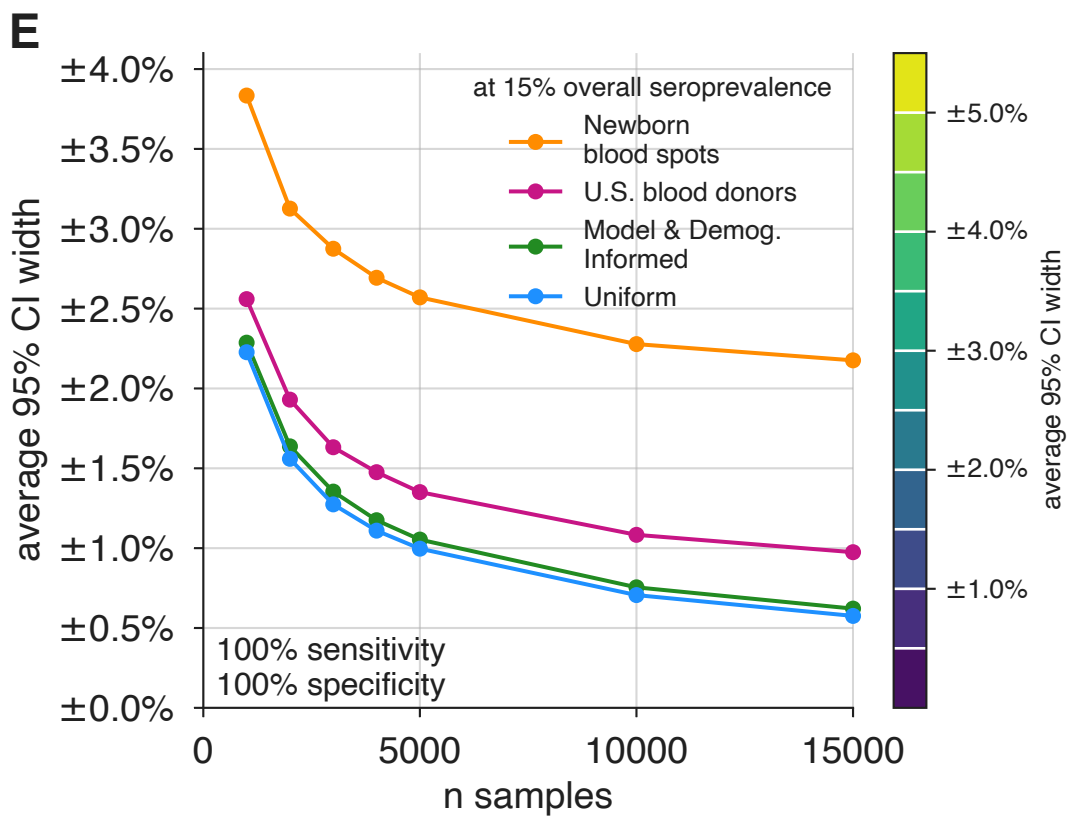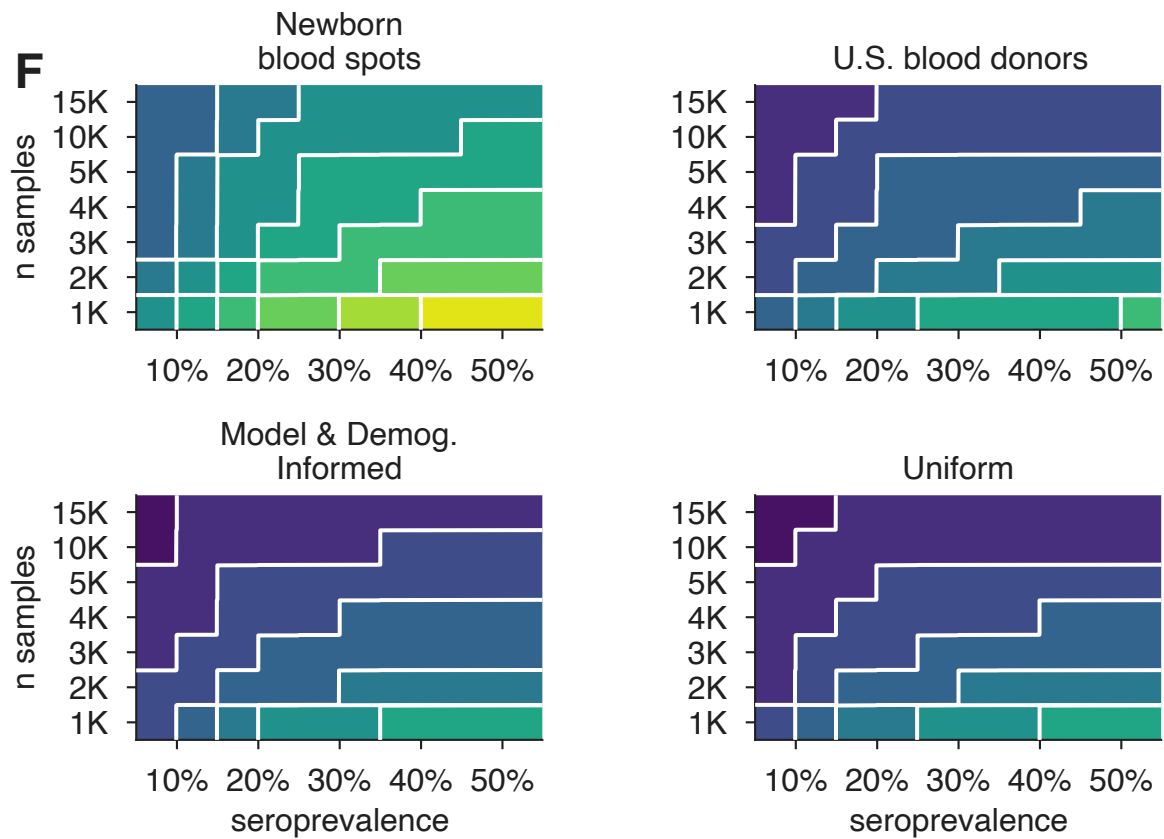

Supplement: supp [file elife-64206-supp-v1.zip]

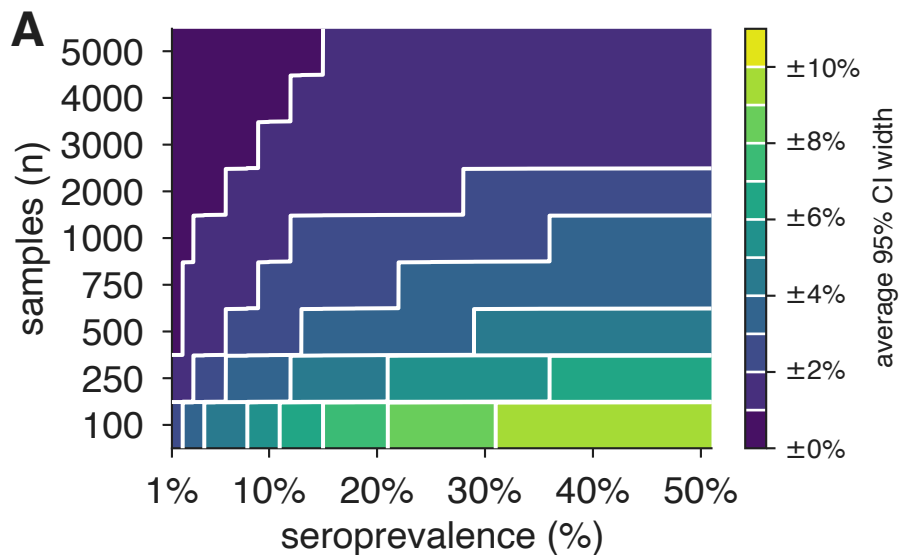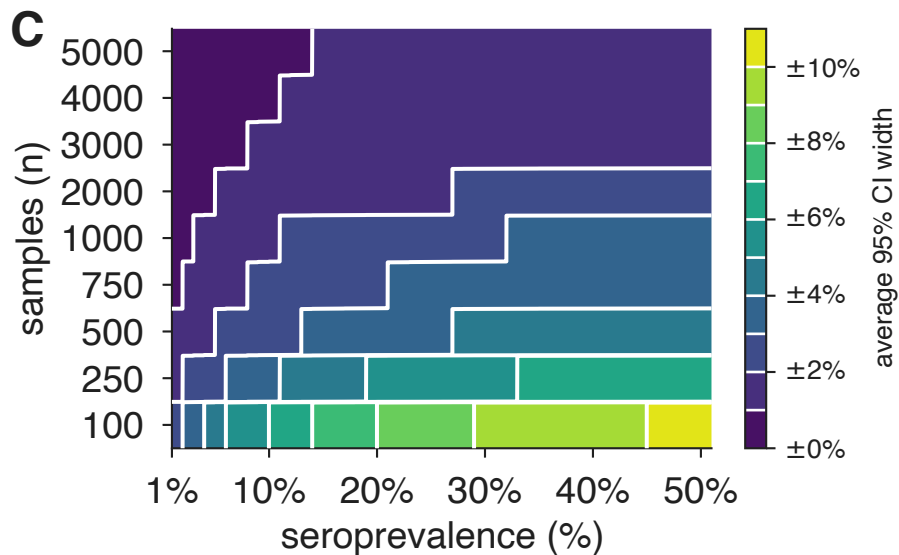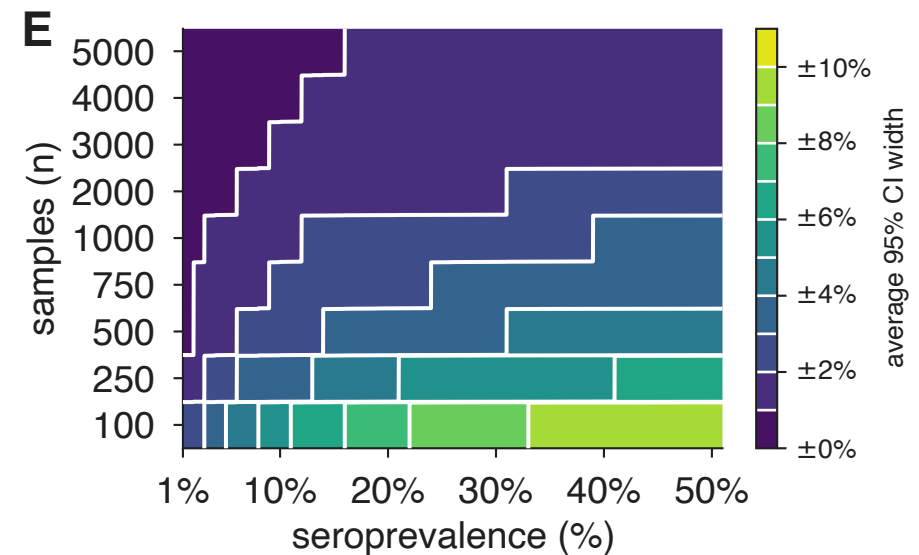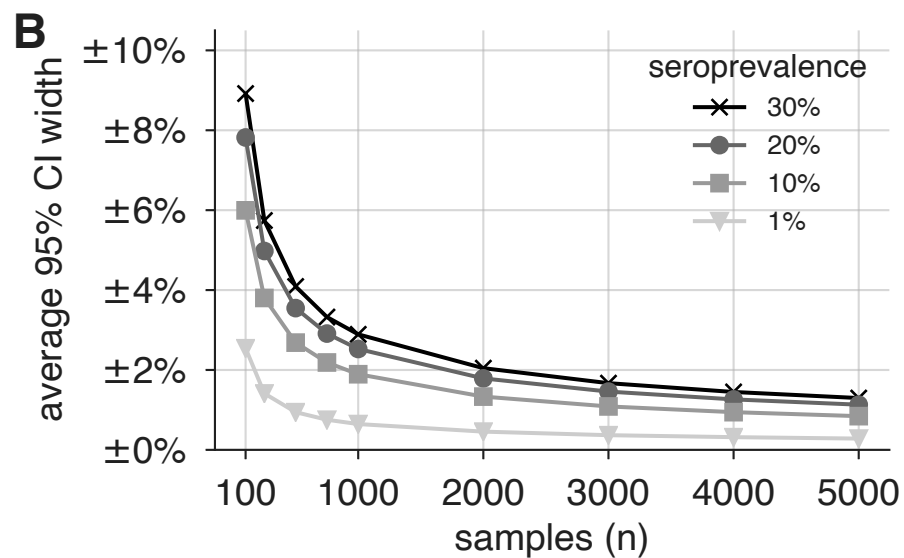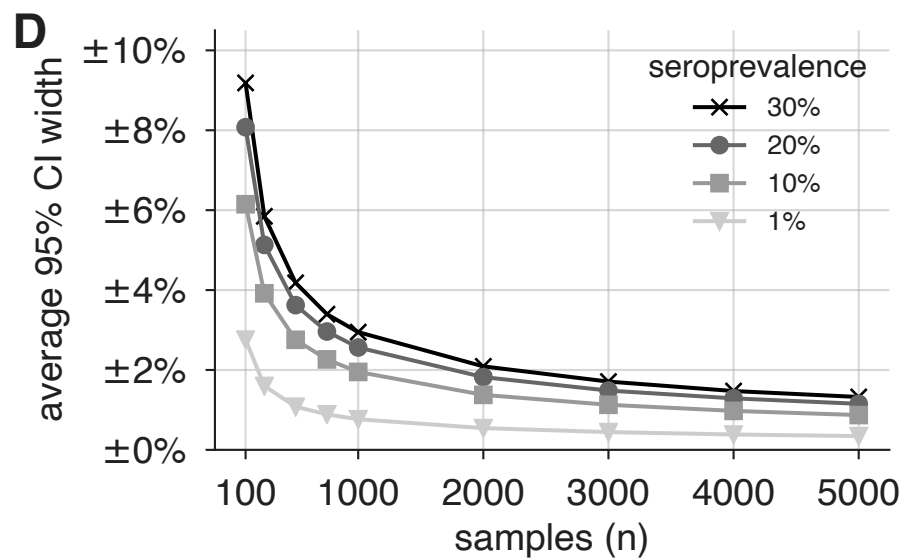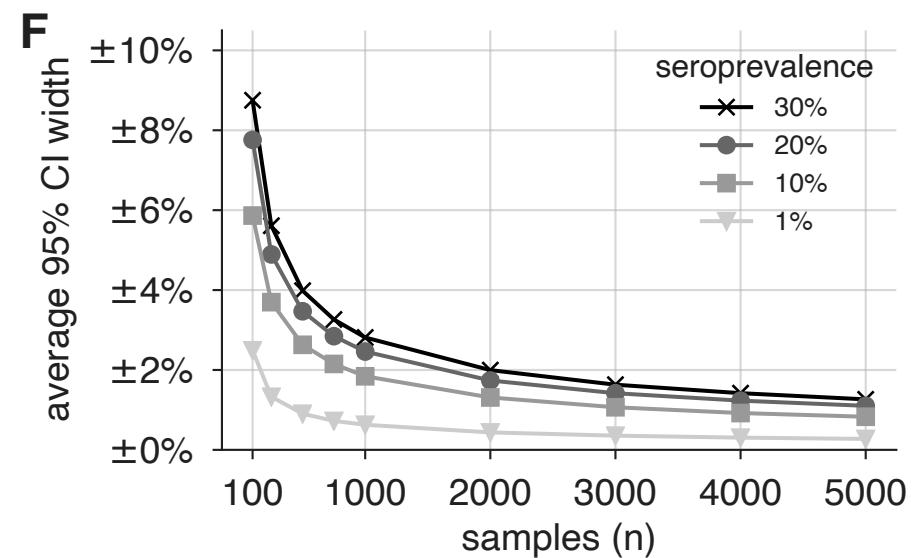

Supplement: supp [file elife-64206-supp-v1.zip]

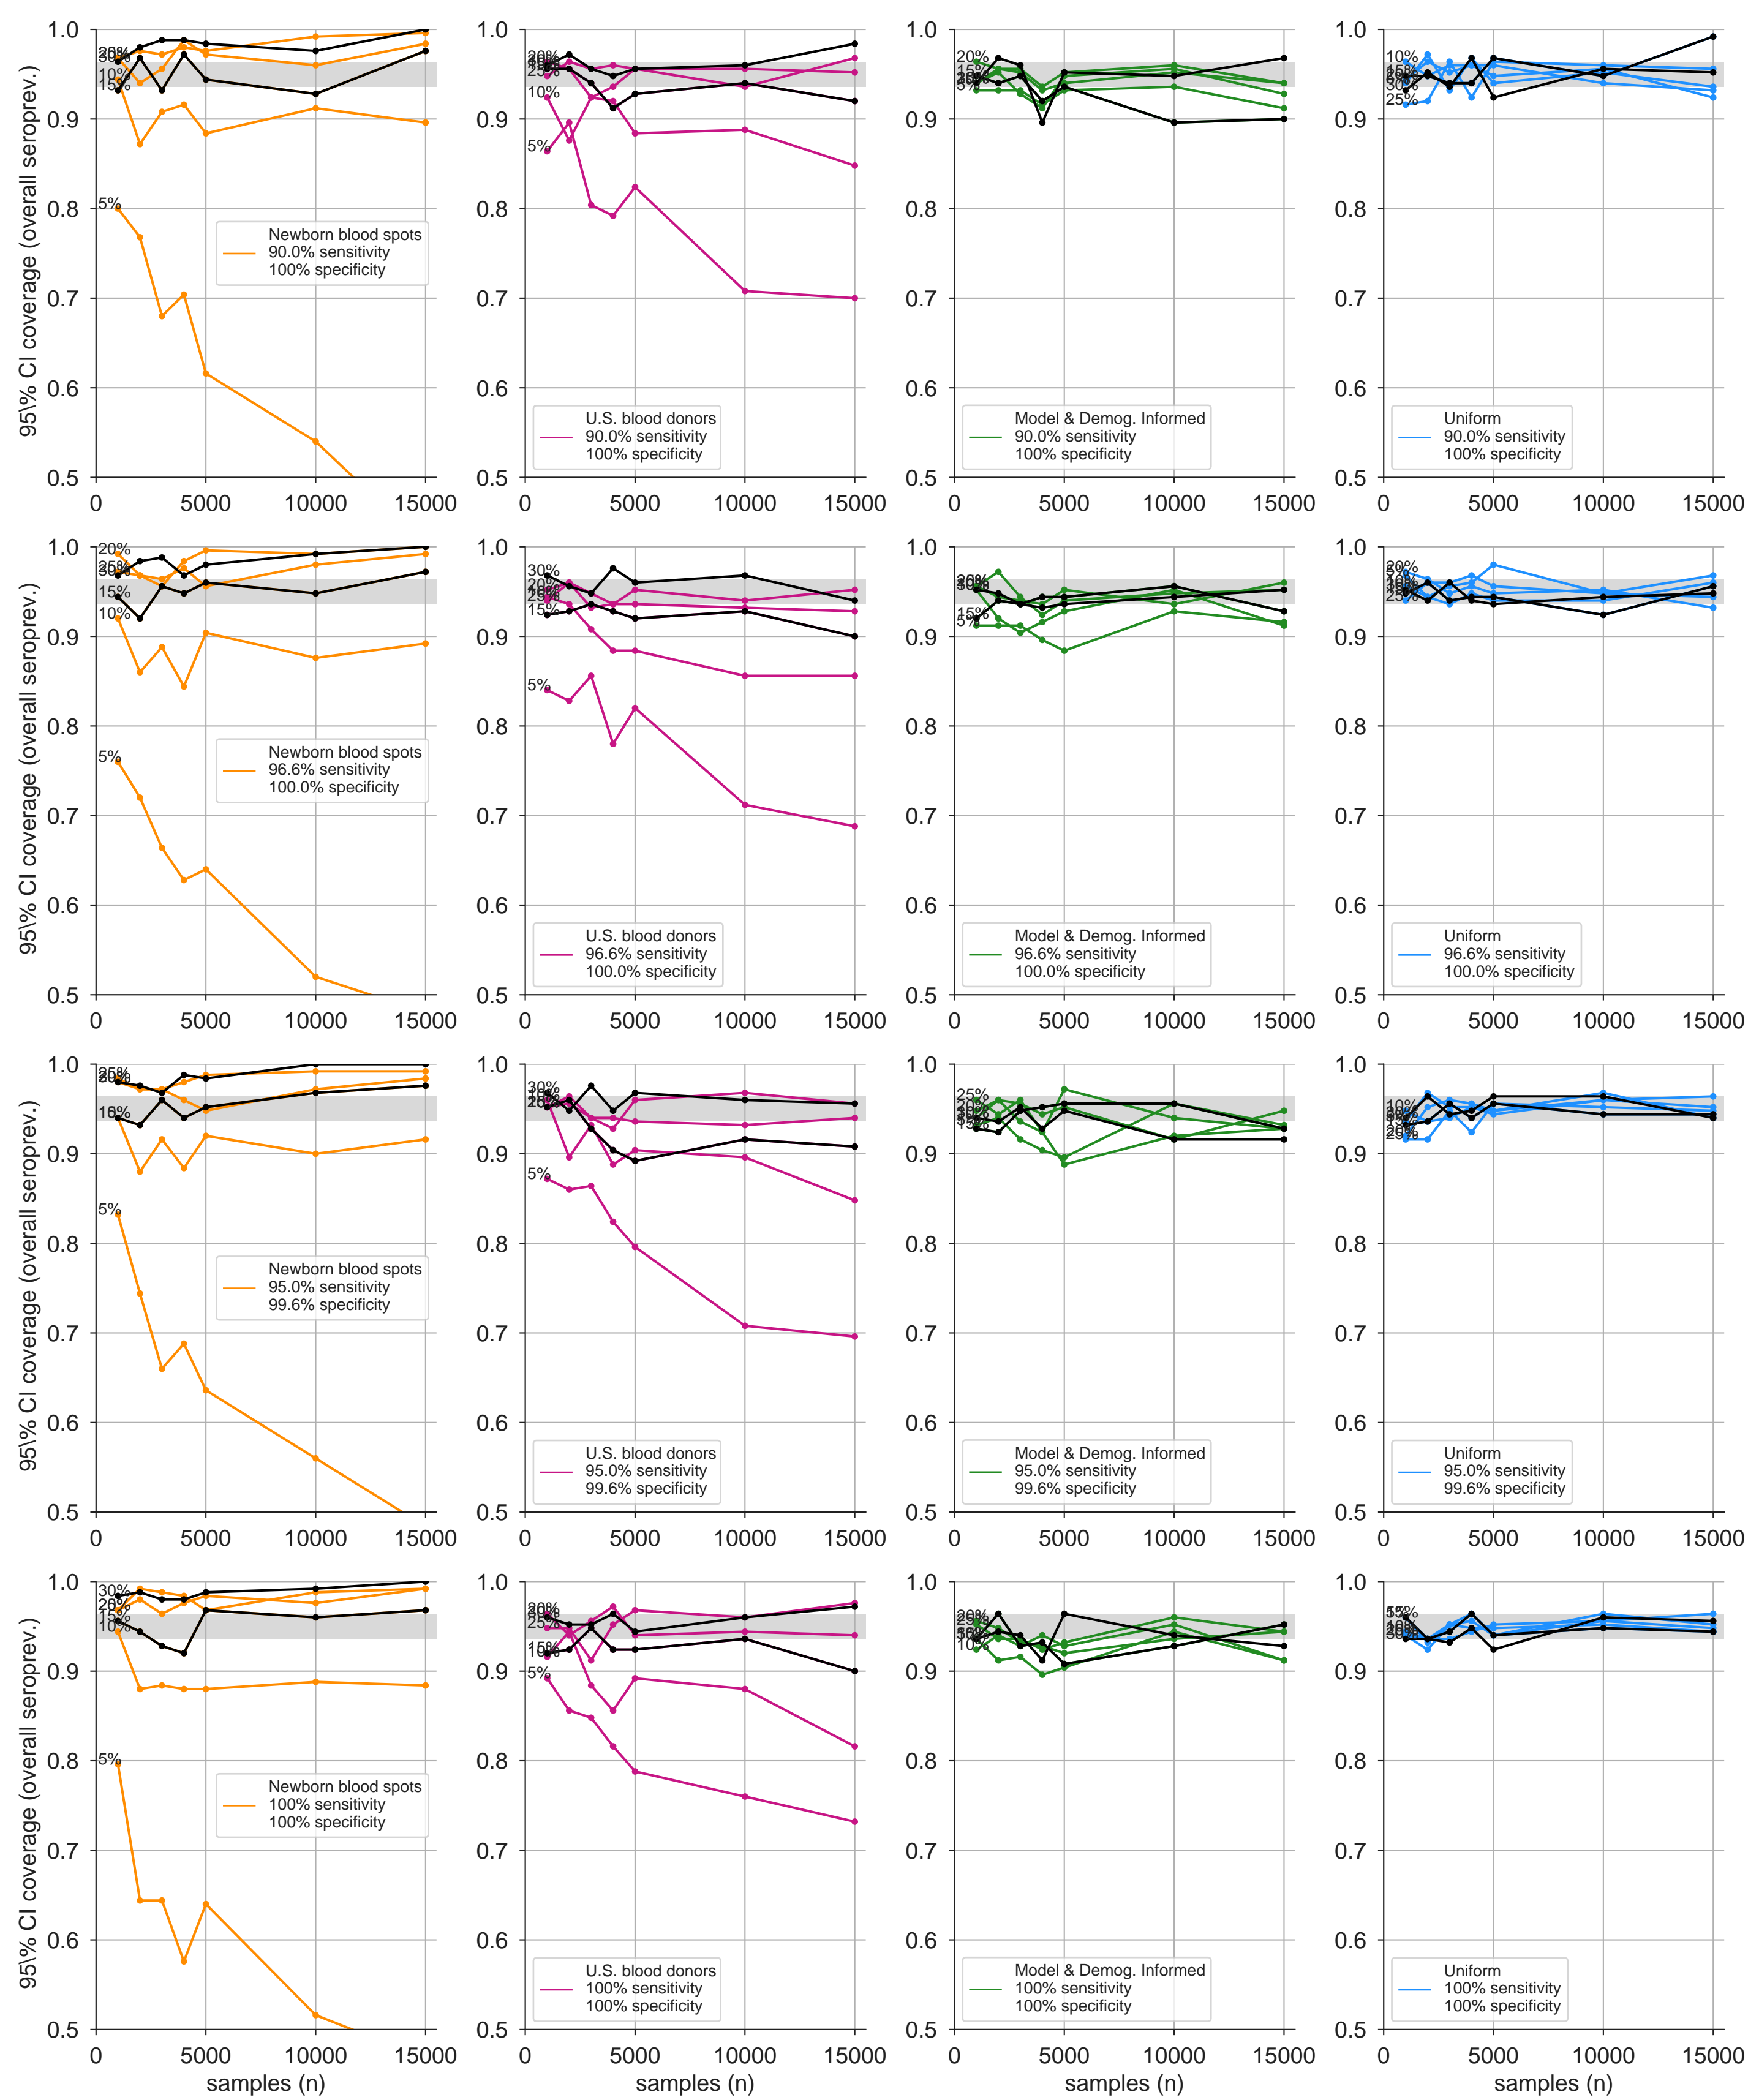

Supplement: supp [file elife-64206-supp-v1.zip]

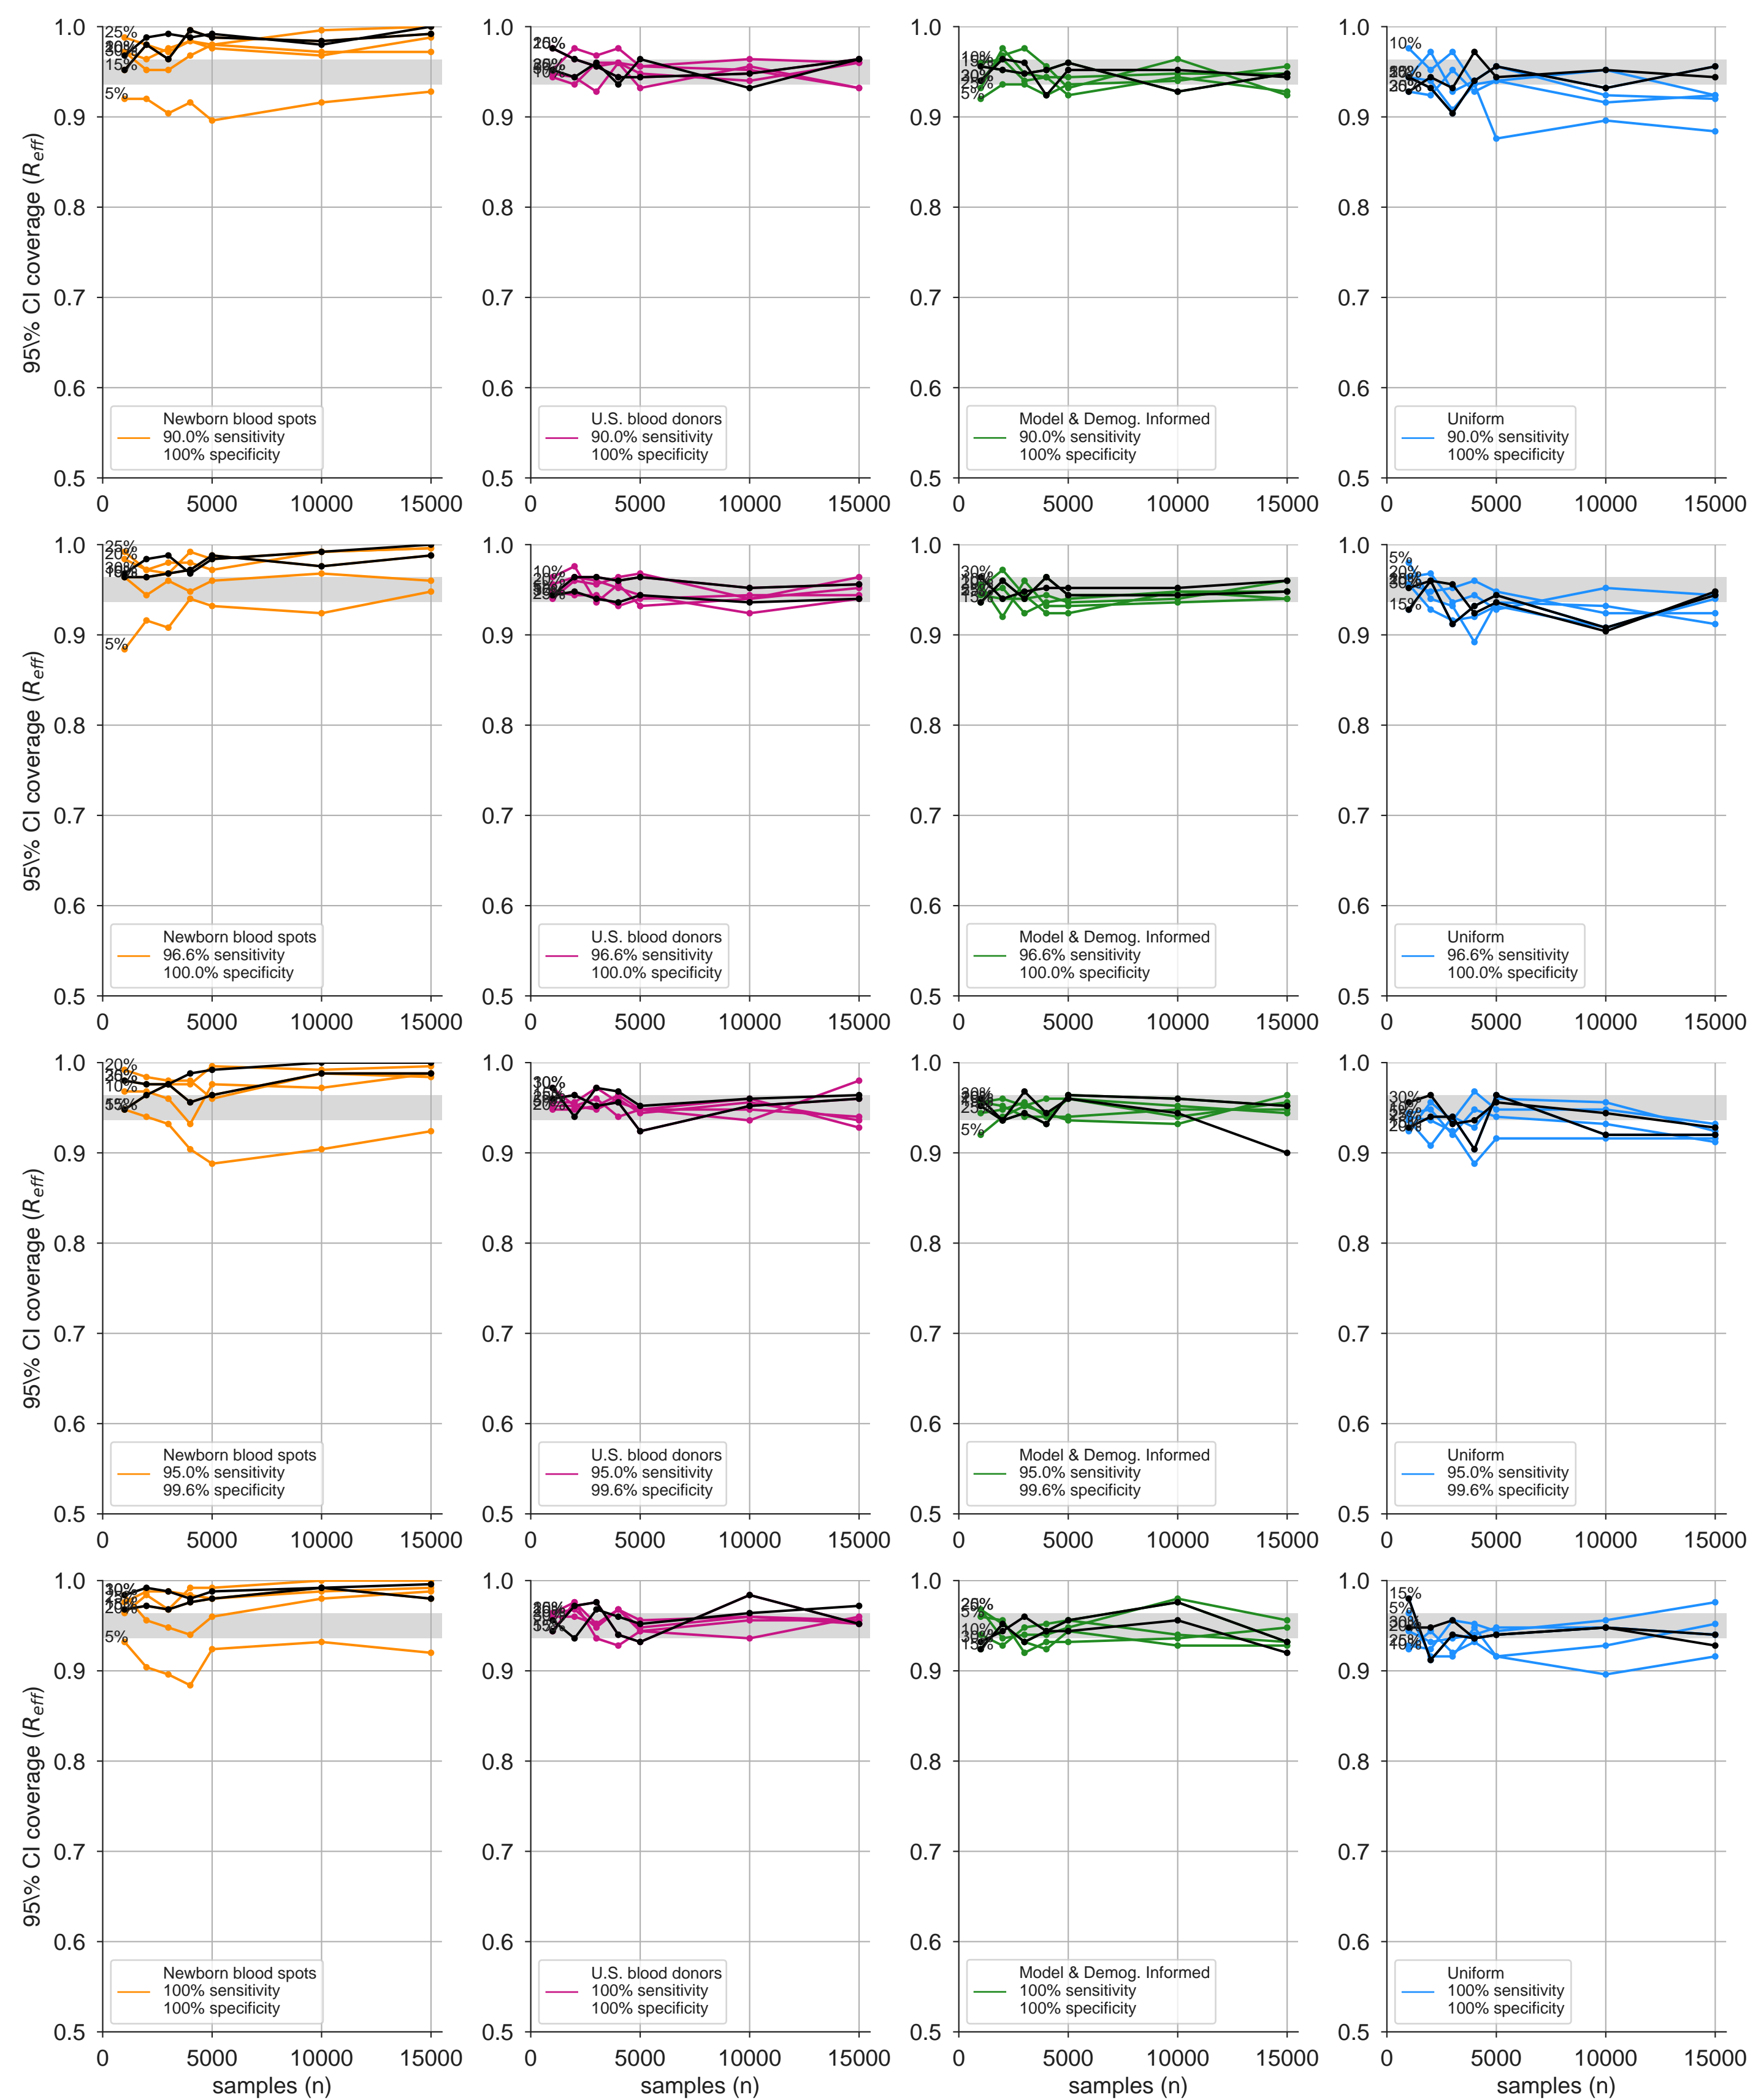

Supplement: supp [file elife-64206-supp-v1.zip]

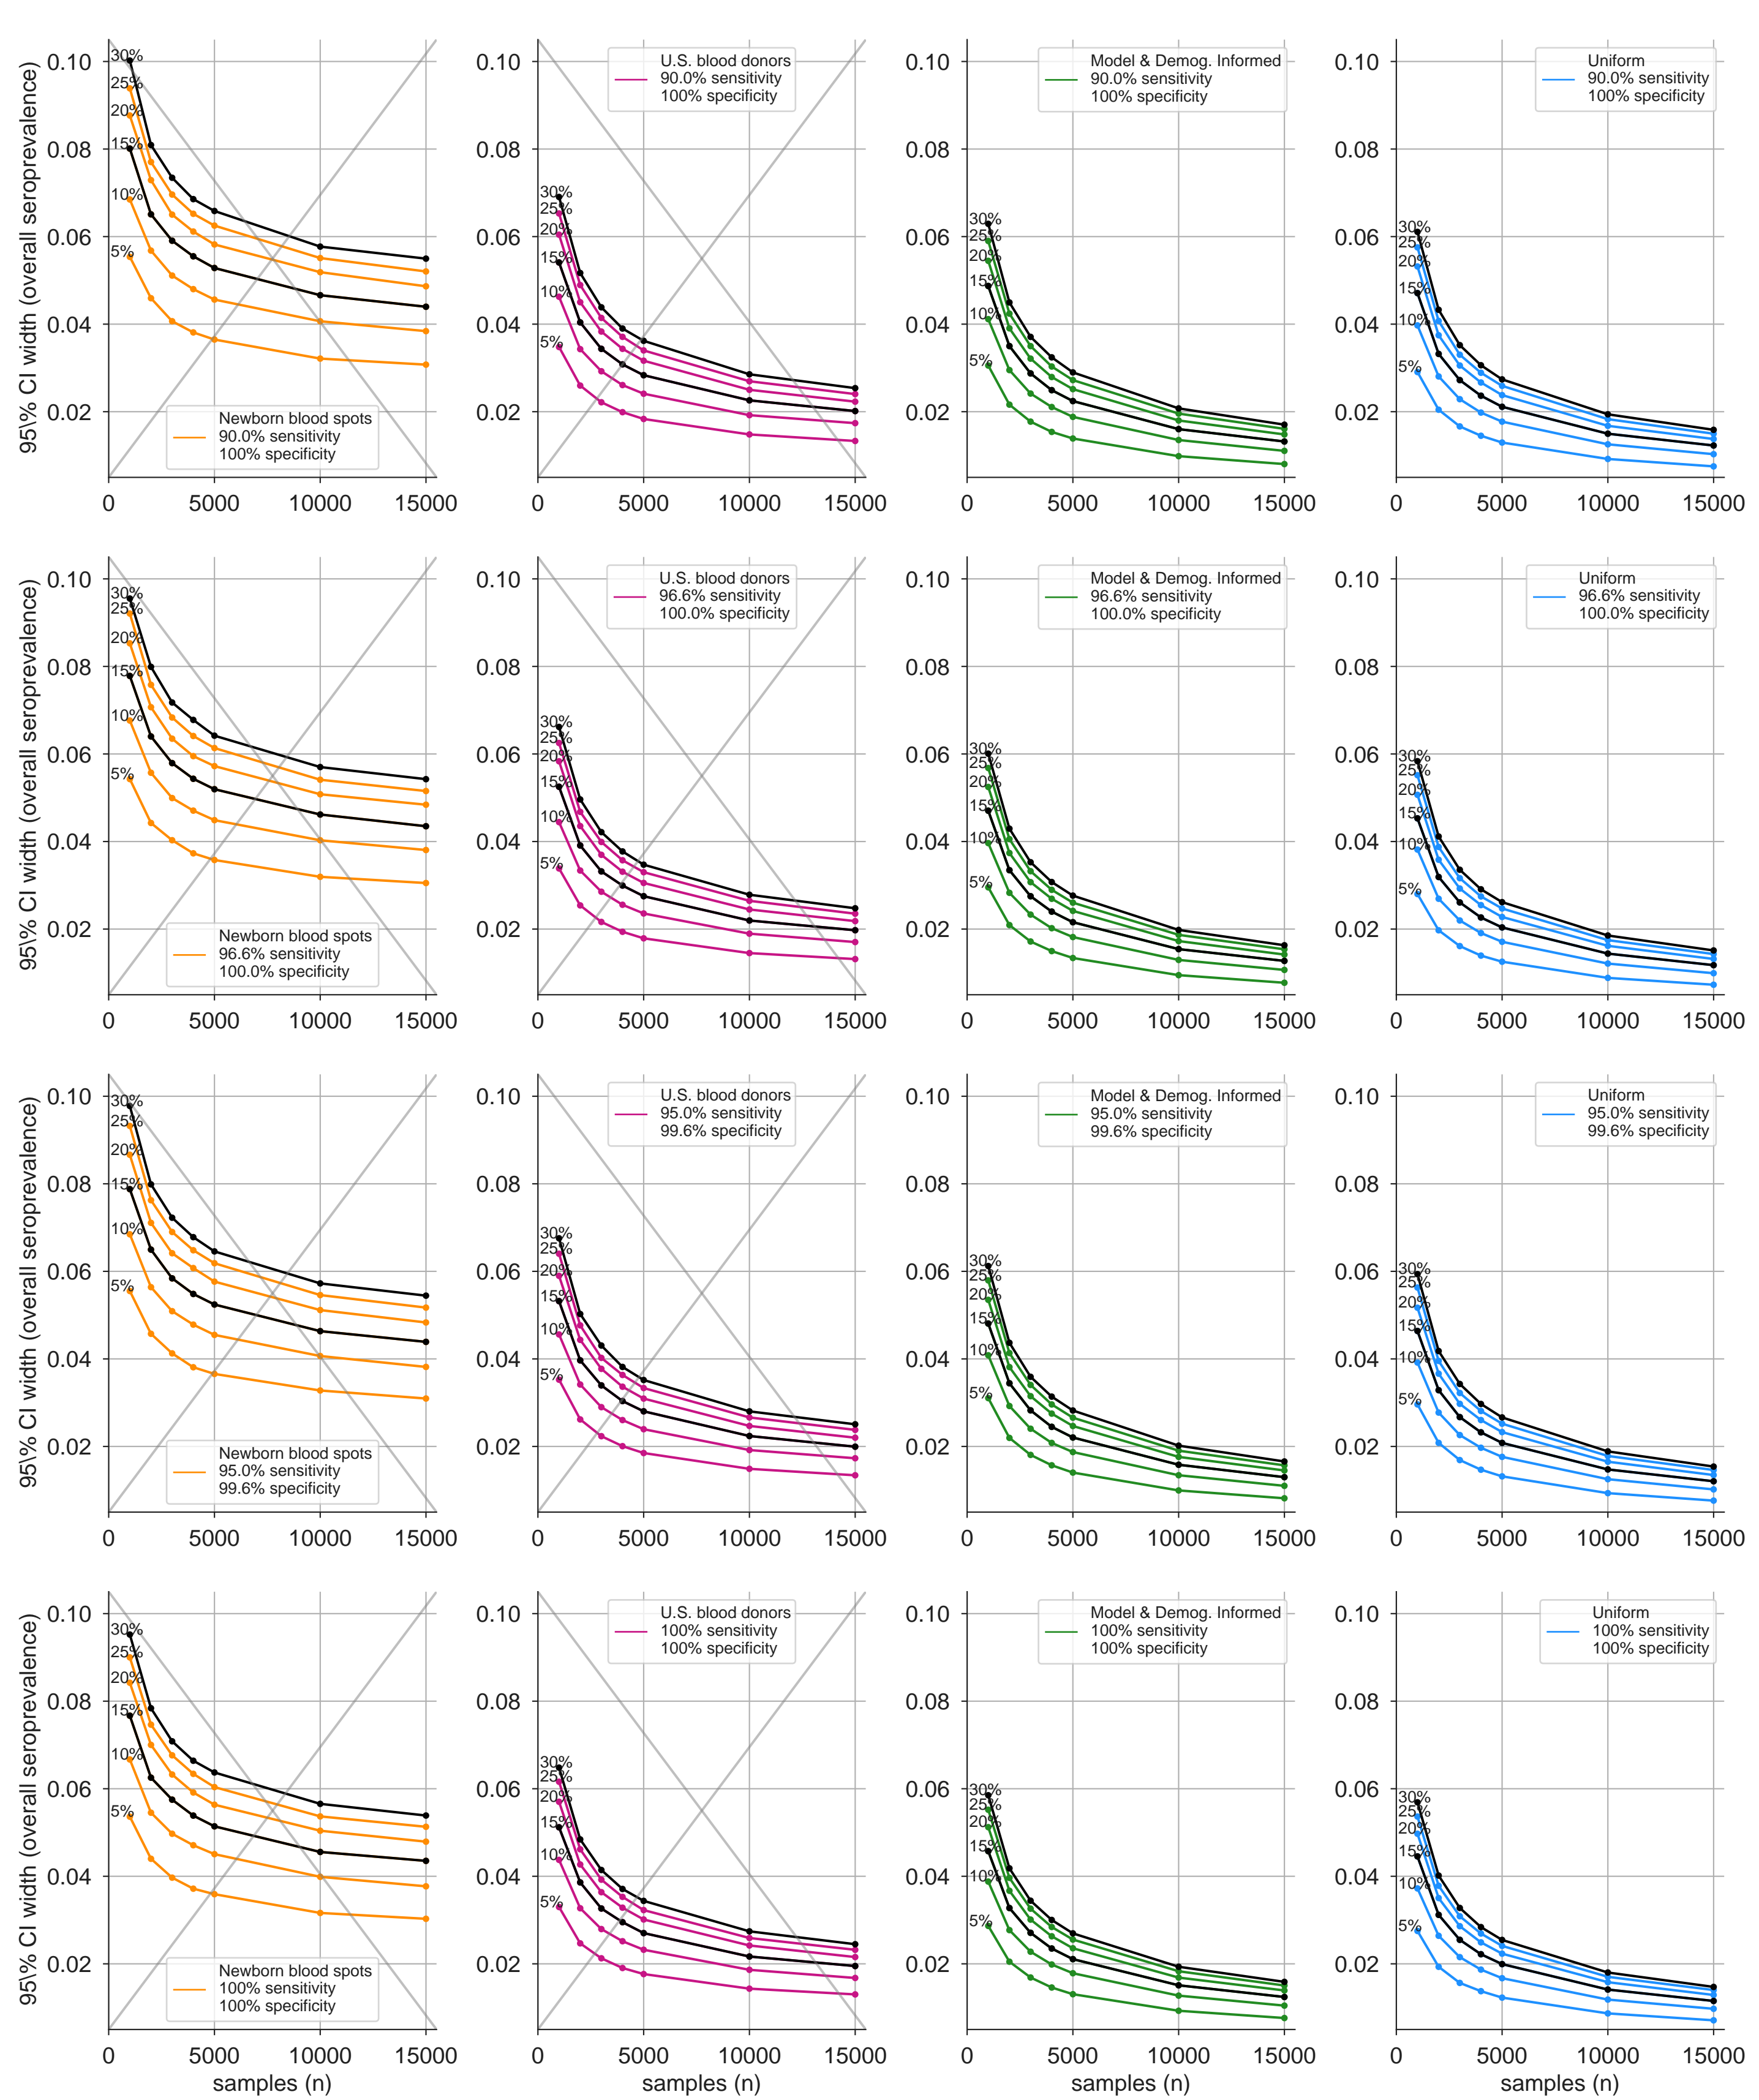

Supplement: supp [file elife-64206-supp-v1.zip]

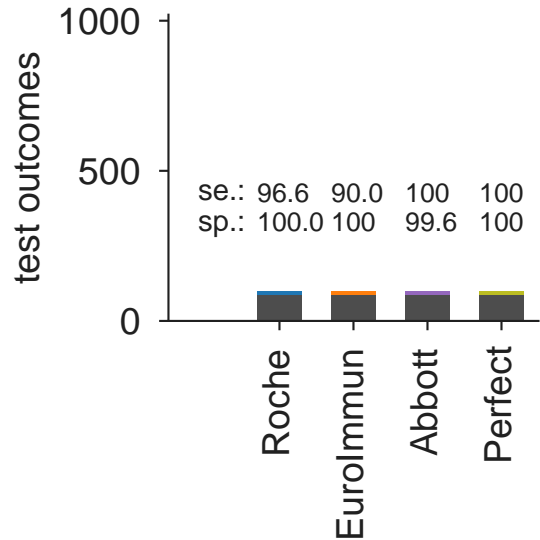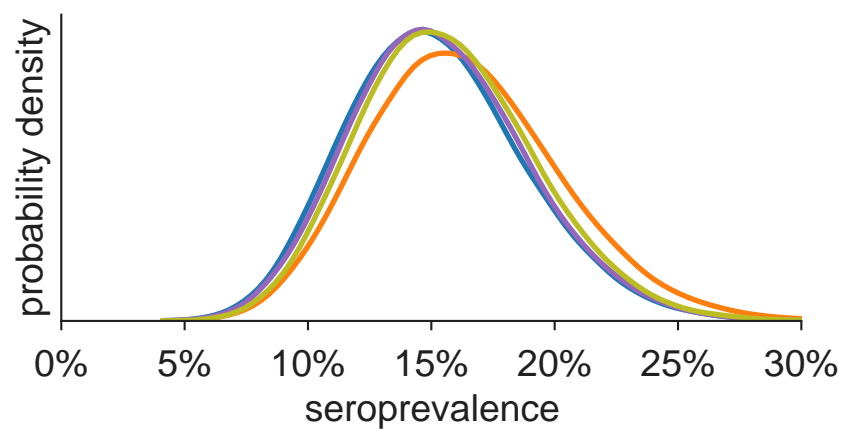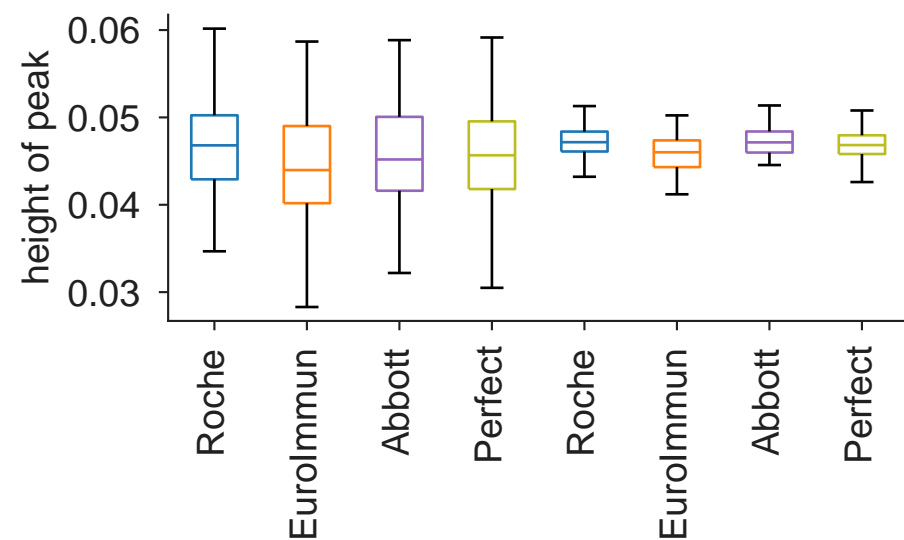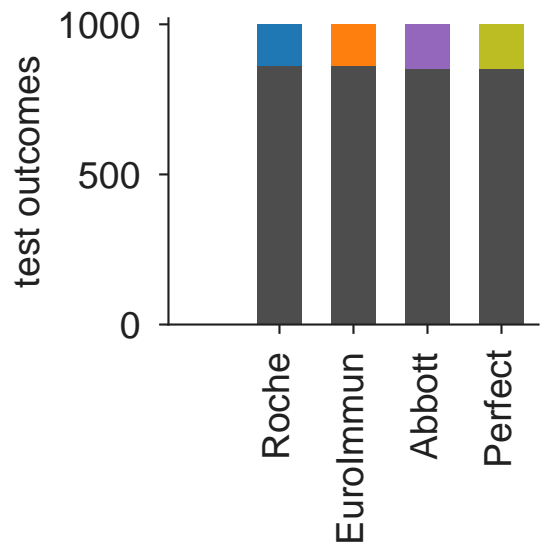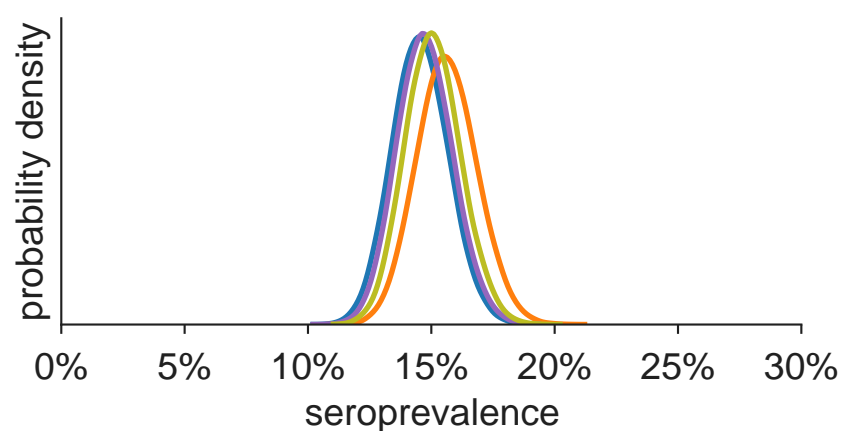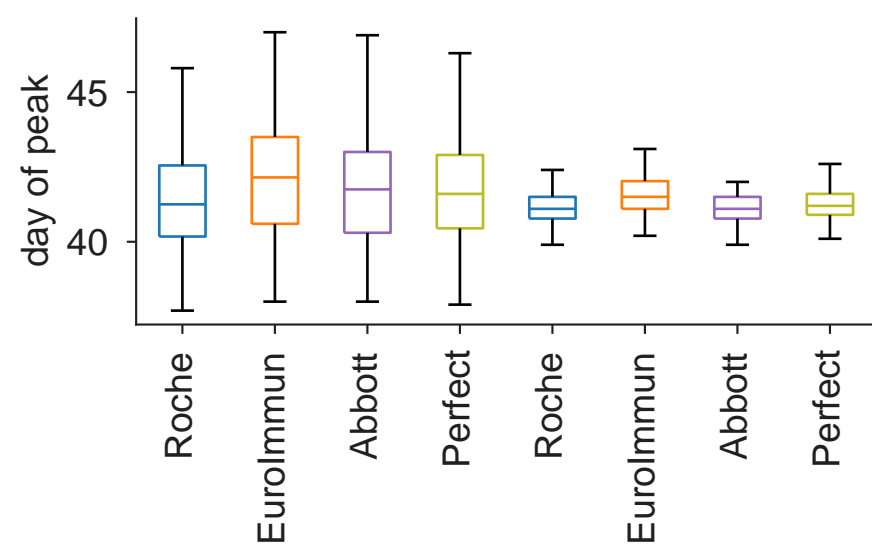

Supplement: supp [file elife-64206-supp-v1.zip]
